# Supplementary material
Source: HighWire-hosted journal article supplement (https://jpet.aspetjournals.org/highwire/filestream/148720/field_highwire_adjunct_files/0/385SupplData.pdf)
Supplement: 385SupplData.pdf [file 385SupplData.pdf]

## SUPPLEMENTAL MATERIALS

**Article title:** Physiologically-Based Pharmacokinetics of Lysosomotropic Chloroquine in Rat and Man

**Authors:** Xin Liu and William J. Jusko

**Journal title:** Journal of Pharmacology and Experimental Therapeutics

**Manuscript number:** JPET-AR-2020-000385

**Table S1.** Comparison of chloroquine pharmacokinetic parameters (Adelusi & Salako, 1982a)

| Tissue | $T_{max}$ (h)    |              | $C_{max}$ ( $\mu\text{g/mL}$ ) |              | $T_{1/2}$ (h)    |              | $\beta$ Slope ( $\text{h}^{-1}$ ) |              |
|--------|------------------|--------------|--------------------------------|--------------|------------------|--------------|-----------------------------------|--------------|
|        | Original article | PBPK fitting | Original article               | PBPK fitting | Original article | PBPK fitting | Original article                  | PBPK fitting |
| Liver  | 7.70             | 6.00         | 14.8                           | 10.7         | 81.7             | 75.7         | 0.0085                            | 0.0092       |
| Kidney | 10.0             | 15.5         | 6.80                           | 5.76         | 94.1             | 105          | 0.0073                            | 0.0066       |
| Lung   | 22.0             | 14.3         | 7.90                           | 8.77         | 138              | 97.3         | 0.0050                            | 0.0071       |
| Spleen | 10.0             | 4.73         | 9.90                           | 9.12         | 75.1             | 80.6         | 0.0092                            | 0.0086       |
| Heart  | 16.0             | 4.73         | 2.40                           | 2.29         | 100              | 79.9         | 0.0069                            | 0.0087       |
| Muscle | 16.0             | 6.34         | 0.60                           | 0.424        | 97.0             | 71.1         | 0.0072                            | 0.0098       |
| Skin   | 24.7             | 4.06         | 0.45                           | 0.407        | 110              | 67.9         | 0.0063                            | 0.0102       |
| RBC    | 1.30             | 1.69         | 1.10                           | 1.12         | 40.0             | 31.0         | 0.0170                            | 0.0223       |
| Plasma | 1.00             | 1.69         | 0.143                          | 0.0969       | 28.2             | 31.0         | 0.0260                            | 0.0223       |

**Table S2.** Digitized and recalculated chloroquine plasma and tissue concentration data for rat

| Time (h) | Chloroquine Concentration ( $\mu\text{g/mL}$ ) |        |       |        |       |       |        |       |       |       |        |
|----------|------------------------------------------------|--------|-------|--------|-------|-------|--------|-------|-------|-------|--------|
|          | Liver                                          | Kidney | Lung  | Spleen | Heart | Brain | Muscle | Skin  | Eye   | RBC   | Plasma |
| 1        | 2.992                                          | 1.480  | 1.959 | 2.322  | 0.832 | 0.997 | 0.223  | 0.198 | 0.361 | 1.012 | 0.139  |
| 2        | 7.095                                          | 3.305  | 5.496 | 4.882  | 1.310 | 1.202 | 0.304  | 0.237 | 0.650 | 0.976 | 0.125  |
| 4        | 13.35                                          | 4.478  | 6.193 | 7.777  | 2.694 | 1.070 | 0.358  | 0.284 | 0.982 | 0.907 | 0.107  |
| 6        | 14.64                                          | 7.143  | 8.486 | 10.58  | 1.857 | 0.882 | 0.449  | 0.266 | 1.175 | 0.615 | 0.092  |
| 12       | 12.55                                          | 7.097  | 8.646 | 12.28  | 1.778 | 1.253 | 0.523  | 0.307 | 1.137 | 0.685 | 0.075  |
| 24       | 10.09                                          | 5.857  | 9.096 | 8.955  | 1.718 | 1.116 | 0.453  | 0.381 | 1.004 | 0.587 | 0.051  |
| 48       | 8.459                                          | 5.306  | 8.734 | 7.665  | 1.689 | 1.437 | 0.393  | 0.299 | 1.453 | 0.375 | 0.031  |
| 72       | 7.254                                          | 4.391  | 7.962 | 6.533  | 1.618 | 0.864 | 0.283  | 0.226 | 1.076 | 0.236 | 0.020  |
| 96       | 5.954                                          | 3.648  | 6.532 | 5.816  | 1.530 | 1.122 | 0.227  | 0.194 | 0.858 | 0.163 | 0.013  |
| 120      | 5.012                                          | 3.468  | 5.387 | 5.145  | 1.371 | 0.778 | 0.185  | 0.154 | 0.644 | 0.127 | 0.009  |
| 144      | 3.980                                          | 2.815  | 4.765 | 4.514  | 1.261 | 0.540 | 0.160  | 0.133 | 0.636 | 0.094 | 0.006  |
| 168      | 2.978                                          | 2.028  | 2.970 | 3.079  | 1.209 | 0.142 | 0.160  | 0.098 | 0.489 | 0.051 | 0.005  |

From: (Adelusi & Salako, 1982a)

**Table S3.** Digitized plasma chloroquine concentrations in man.

| 150 mg   |       | 300 mg   |       | 600 mg   |       |
|----------|-------|----------|-------|----------|-------|
| Time (h) | ng/mL | Time (h) | ng/mL | Time (h) | ng/mL |
| 24       | 19.74 | 24       | 46.51 | 8        | 91.32 |
| 75       | 7.177 | 48       | 25.69 | 12       | 68.83 |
| 296      | 2.031 | 72       | 35.24 | 24       | 51.89 |
| 583      | 0.948 | 95       | 14.77 | 95       | 31.30 |
| 926      | 0.778 | 177      | 4.720 | 130      | 17.02 |
| 1342     | 0.408 | 308      | 3.545 | 144      | 12.64 |
| 1600     | 0.308 | 453      | 2.698 | 156      | 9.688 |
| 2001     | 0.205 | 641      | 1.315 | 385      | 5.132 |
| 2345     | 0.155 | 815      | 1.116 | 581      | 3.450 |
| 3090     | 0.096 | 1076     | 0.913 | 647      | 2.258 |
| 4050     | 0.072 | 1250     | 0.807 | 1121     | 1.164 |
|          |       | 1540     | 0.534 | 1366     | 0.866 |
|          |       | 2018     | 0.332 | 1840     | 0.487 |
|          |       | 2394     | 0.291 | 2298     | 0.347 |
|          |       | 3075     | 0.248 | 3001     | 0.310 |
|          |       | 4148     | 0.146 | 3524     | 0.292 |
|          |       | 5250     | 0.080 | 4162     | 0.210 |

From (Frisk-Holmberg et al, 1984)

## Predictability of the PBPK model for chloroquine in rats for a different data set

A second study of the pharmacokinetics and tissue distribution of chloroquine was carried out by (Adalusi and Salako, 1982b). Groups of Wistar rats were fed with different diets including (commercial rat diet, cassava-based diet [altered carbohydrate source], and kwashiorkorigenic diet [low protein]) to assess effects of malnourishment. The data from the first group were not graphed, so data from the cassava-based diet group were digitized as this group showed similar body weights as the control group. Chloroquine was given intraperitoneally at a dose of 10 mg/kg. Blood and tissues were taken at various times. Graphical data were digitized to yield the numerical values listed in Table S4.

**Table S4. Plasma and tissue concentrations of chloroquine**

| Time (hour) | Chloroquine concentrations ( $\mu\text{g}/\text{mL}$ ) |       |       |       |
|-------------|--------------------------------------------------------|-------|-------|-------|
|             | Plasma                                                 | RBC   | Liver | Skin  |
| 1           | 0.1297                                                 | 1.076 | 5.19  | 0.212 |
| 2           | 0.1148                                                 | 1.003 | 6.40  | 0.233 |
| 4           | 0.1023                                                 | 0.907 | 11.88 | 0.256 |
| 6           | 0.0924                                                 | 0.821 | 13.72 | 0.288 |
| 12          | 0.0768                                                 | 0.737 | 12.55 | 0.298 |
| 24          | 0.0536                                                 | 0.628 | 10.94 | 0.401 |
| 48          | 0.0316                                                 | 0.369 | 7.30  | 0.403 |
| 72          | 0.0201                                                 | 0.244 | 5.72  | 0.332 |
| 96          | 0.0126                                                 | 0.147 | 4.94  | 0.259 |
| 120         | 0.0098                                                 | 0.100 | 4.51  | 0.199 |
| 144         | 0.0068                                                 | 0.087 | 3.77  | 0.169 |
| 168         | 0.0054                                                 | 0.071 | 3.20  | 0.140 |

The first-stage PBPK model and parameters obtained from the main study were used to simulate the available tissue and plasma profiles from this study. The figure below demonstrates excellent capture of the liver, RBC, skin, and plasma profiles from this study.

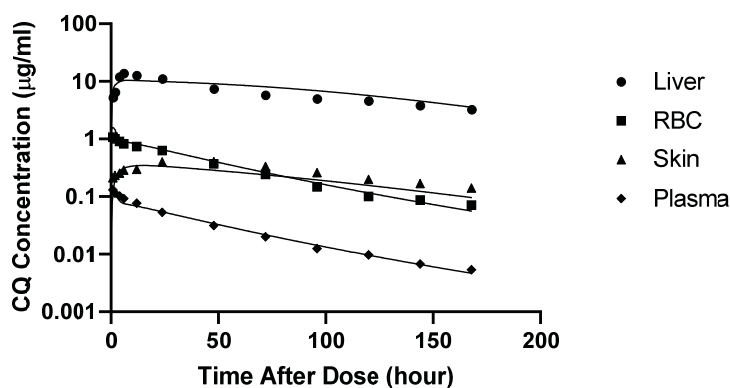

**Figure S1. Simulation for rat tissues, RBC and plasma concentrations with PBPK model**

## Adapt code for rat PBPK model

```
1 c*****
*****
2 C ADAPT *
3 C Version 5 *
4 C*****
5 C *
6 C MODEL *
7 C *
8 C This file contains Fortran subroutines into which the user *
9 C must enter the relevant model equations and constants. *
10 C Consult the User's Guide for details concerning the format for *
11 C entered equations and definition of symbols. *
12 C *
13 C 1. Symbol- Parameter symbols and model constants *
14 C 2. DiffEq- System differential equations *
15 C 3. Output- System output equations *
16 C 4. Varmod- Error variance model equations *
17 C 5. Covmod- Covariate model equations (ITS,MLEM) *
18 C 6. Popinit- Population parameter initial values (ITS,MLEM) *
19 C 7. Prior - Parameter mean and covariance values (ID,NPD,STS) *
20 C 8. Sparam- Secondary parameters *
21 C 9. Amat - System state matrix *
22 C *
23 C*****
24 C#####C
25 Subroutine SYMBOL
26 Implicit None
27 Include 'globals.inc'
28 Include 'model.inc'
29 CC
30 C-----C
31 C Enter as Indicated C
32 C---c-----C
33 NDEqs = 22 ! Enter # of Diff. Eqs.
34 NSParam = 21 ! Enter # of System Parameters.
35 NVparam = 2 ! Enter # of Variance Parameters.
36 NSecPar = 0 ! Enter # of Secondary Parameters.
37 NSecOut = 0 ! Enter # of Secondary Outputs (not used).
38 leqsol = 1 ! Model type: 1 - DIFFEQ, 2 - AMAT, 3 - OUTPUT only.
39 Descr = ' simple PBPK of QC '
40 CC
41 C-----C
42 C Enter Symbol for Each System Parameter (eg. Psym(1)='Kel') C
43 C---c-----C
44 Psym(1)='Bmax_liver'
45 Psym(2)='Bmax_kidney'
46 Psym(3)='Bmax_heart'
47 Psym(4)='Bmax_muscle'
48 Psym(5)='Bmax_skin'
49 Psym(6)='Bmax_lung'
50 Psym(7)='Bmax_spleen'
```

```

51 Psym(8)='Bmax_brain'
52 Psym(9)='Bmax_eye'
53 Psym(10)='Bmax_carcass'
54 Psym(11)='KD'
55 Psym(12)='KD2'
56 Psym(13)='kap'
57 Psym(14)='Kal'
58 Psym(15)='CL_u,int'
59 Psym(16)='CL_u,renal'
60 Psym(17)='ft'
61 Psym(18)='PS'
62 Psym(19)='PS2'
63 Psym(20)='PS3'
64 Psym(21)='PS4'
65 CC
66 C-----C
67 C Enter Symbol for Each Variance Parameter {eg: PVsym(1)='Sigma'} C
68 C---c-----C
69 PVsym(1)='sigma'
70 PVsym(2)='intercept'
71 CC
72 C-----C
73 C Enter Symbol for Each Secondary Parameter {eg: PSsym(1)='CLt'} C
74 C---c-----C
75 C-----C
76 C-----C
77 C
78 Return
79 End
80 C#####C
81 Subroutine DIFFEQ(T,X,XP)
82 Implicit None
83 Include 'globals.inc'
84 Include 'model.inc'
85 Real*8 T,X(MaxNDE),XP(MaxNDE)
86 Real*8 ka, F, Cl_kidney, Cl_liver, fu
87 Real*8 Bmax_liver, Kp_liver ,Kp_heart,KD3
88 Real*8 Kp_kidney, Bmax_kidney, Bmax_muscle,Kp_carcass
89 Real*8 Bmax_heart, Kp_muscle, Kp_skin, Bmax_skin,KD,KD2
90 Real*8 Q_liver, Q_heart, Q_gut, Q_kidney, Q_skin,Q_muscle
91 Real*8 Q_slow,Q_rapid, Q_blood,Q_carcass,ft_s,kal
92 Real*8 V_liver,V_kidney, V_muscle,V_blood,V_carcass,V_plasma
93 Real*8 V_heart,V_slow, V_rapid, V_skin, V_gut,Cl,ft_m
94 Real*8 Vmaxr,Kmr, Vmaxl,Kml,ft_h,ft_k,ft_l,fi,GFR,ft_c
95 Real*8 Q_lung, Q_spleen, Q_brain, Q_eye, Kp_lung, Kp_spleen
96 Real*8 Kp_brain, Kp_eye, V_lung,V_spleen, V_brain, V_eye
97 Real*8 V_artery, V_vein,Bmax_spleen,ft_b,ft_e,PS,PS2,PS3,PS4
98 Real*8 Bmax_lung,Bmax_eye,Bmax_brain,Bmax_carcass
99 Real*8 V_liver2,V_kidney2,V_heart2,V_muscle2,V_skin2,V_lung2
100 real*8 V_spleen2,V_brain2
101 CC
102 C-----C
103 C Enter Differential Equations Below {e.g. XP(1) = -P(1)*X(1) } C

```

104 C---c-----C  
105 Bmax\_liver=P(1)  
106 Bmax\_kidney=P(2)  
107 Bmax\_heart=P(3)  
108 Bmax\_muscle=P(4)  
109 Bmax\_skin=P(5)  
110 Bmax\_lung=P(6)  
111 Bmax\_spleen=P(7)  
112 Bmax\_brain=P(8)  
113 Bmax\_eye=P(9)  
114 Bmax\_carcass=P(10)  
115 KD=P(11)  
116 KD2=P(12)  
117 ka=P(13)  
118 kal=P(14)  
119 Cl=P(15)  
120 Cl\_kidney=P(16)  
121 ft\_e=1.0  
122 ft\_k=1.0  
123 ft\_l=1.0  
124 ft\_m=P(17)  
125 ft\_h=1.0  
126 ft\_b=1.0  
127 ft\_s=P(17)  
128 ft\_c=1.0  
129 PS=P(18)  
130 PS2=P(19)  
131 PS3=P(20)  
132 PS4=P(21)  
133 ! Tissue volume (mL/kg)  
134 V\_kidney=5.25\*0.273  
135 V\_liver=32.31\*0.161  
136 V\_heart=2.19\*0.320  
137 V\_skin=174.45\*0.382  
138 V\_muscle=422.68\*0.118  
139 V\_lung=2.642\*0.336  
140 V\_spleen=0.973\*0.207  
141 V\_brain=4.643\*0.162  
142 V\_eye=0.74  
143 V\_artery= 21.1  
144 V\_vein=42.1  
145 V\_carcass=290.92  
146 V\_kidney2=5.25\*(1.0-0.273)  
147 V\_liver2=32.31\*(1.0-0.161)  
148 V\_heart2=2.19\*(1.0-0.32)  
149 V\_skin2=174.45\*(1.0-0.382)  
150 V\_muscle2=422.68\*(1.0-0.118)  
151 V\_lung2=2.642\*(1.0-0.336)  
152 V\_spleen2=0.973\*(1.0-0.207)  
153 V\_brain2=4.643\*(1.0-0.162)  
154 ! plasma flow was used to describe the flow rate to each tissues (mL/h/kg)  
155 Q\_kidney=1385  
156 Q\_liver= 2191

157 Q\_heart= 574  
158 Q\_skin= 758  
159 Q\_muscle= 3512  
160 Q\_carcass=1735  
161 Q\_lung =11181.6  
162 Q\_spleen=679  
163 Q\_brain=248  
164 Q\_eye=99.6  
165 GFR=315  
166 !Kp  
167 fu=0.4  
168 Kp\_heart=1+Bmax\_heart/(KD+X(5))  
169 Kp\_kidney=1+Bmax\_kidney/(KD+X(4))  
170 Kp\_liver=1+Bmax\_liver/(KD+X(3))  
171 Kp\_muscle=1+Bmax\_muscle/(KD2+X(7))  
172 Kp\_skin=1+Bmax\_skin/(KD2+X(6))  
173 Kp\_lung=1+Bmax\_lung/(KD+X(8))  
174 Kp\_spleen=1+Bmax\_spleen/(KD+X(9))  
175 Kp\_brain=1+Bmax\_brain/(KD+X(10))  
176 Kp\_eye=fu\*(1+Bmax\_eye/(KD2+fu\*X(1)))  
177 Kp\_carcass=fu\*(1+Bmax\_carcass/(KD+fu\*X(1)))  
178 !IP bolus in rat  
179 !artery  
180 XP(1)=(Q\_lung\*X(8)/fu+ka\*X(2)-fu\*GFR\*X(1)  
181 -(Q\_liver+Q\_kidney+Q\_heart+Q\_skin\*ft\_s+  
182 Q\_muscle\*ft\_m+Q\_spleen+Q\_brain+Q\_eye\*ft\_e+  
183 Q\_carcass\*ft\_c)\*X(1))/V\_artery  
184 !vein  
185 XP(14)=((Q\_liver+Q\_spleen)\*X(3)/fu+Q\_kidney\*X(4)/fu+Q\_heart\*  
186 X(5)/fu+Q\_skin\*ft\_s\*X(6)/fu+Q\_muscle\*ft\_m\*X(7)/fu  
187 +Q\_brain\*ft\_b\*X(10)/fu+Q\_eye\*ft\_e\*X(11)/  
188 Kp\_eye+  
189 Q\_carcass\*ft\_c\*X(12)/Kp\_carcass-Q\_lung\*X(14))/V\_vein  
190 !absorption in plasma  
191 XP(2)=-ka\*X(2)  
192 !absorption in liver  
193 XP(13)=-kal\*X(13)  
194 !liver  
195 XP(3)=(Q\_liver\*(X(1)-X(3)/fu)+Q\_spleen\*(X(9)/fu-X(3)/fu)  
196 +kal\*X(13)-PS\*(X(3)-  
197 X(15)/Kp\_liver))/V\_liver  
198 XP(15)=(PS\*(X(3)-X(15)/Kp\_liver)-  
199 Cl\*X(15)/Kp\_liver)/V\_liver2  
200 !kidney  
201 XP(4)=(Q\_kidney\*(X(1)-X(4)/fu)-PS2\*(X(4)-  
202 X(16)/Kp\_kidney))/V\_kidney  
203 XP(16)=(PS2\*(X(4)-X(16)/Kp\_kidney)-  
204 Cl\_kidney\*X(16)/Kp\_kidney)/V\_kidney2  
205 !heart  
206 XP(5)=(Q\_heart\*(X(1)-X(5)/fu)-PS3\*(X(5)-  
207 X(17)/Kp\_heart))/V\_heart  
208 XP(17)=PS3\*(X(5)-X(17)/Kp\_heart)/V\_heart2  
209 !skin

```

210 XP(6)=(Q_skin*ft_s*(X(1)-X(6)/fu)-PS4*(X(6)-
211 X(18)/Kp_skin))/V_skin
212 XP(18)=PS4*(X(6)-X(18)/Kp_skin)/V_skin2
213 !muscle
214 XP(7)=(Q_muscle*ft_m*(X(1)-X(7)/fu)-PS4*(X(7)-
215 X(19)/Kp_muscle))/V_muscle
216 XP(19)=PS4*(X(7)-X(19)/Kp_muscle)/V_muscle2
217 !lung
218 XP(8)=(Q_lung*(X(14)-X(8)/fu)-PS2*(X(8)-
219 X(20)/Kp_lung))/V_lung
220 XP(20)=PS2*(X(8)-X(20)/Kp_lung)/V_lung2
221 !spleen
222 XP(9)=(Q_spleen*(X(1)-X(9)/fu)-PS2*(X(9)-
223 X(21)/Kp_spleen))/V_spleen
224 XP(21)=PS2*(X(9)-X(21)/Kp_spleen)/V_spleen2
225 !brain
226 XP(10)=(Q_brain*(X(1)-X(10)/fu)-PS3*(X(10)-
227 X(22)/Kp_brain))/V_brain
228 XP(22)=PS3*(X(10)-X(22)/Kp_brain)/V_brain2
229 !eye
230 XP(11)=Q_eye*ft_e*(X(1)-X(11)/Kp_eye)/V_eye
231 !carcass
232 XP(12)=Q_carcass*ft_c*(X(1)-X(12)/Kp_carcass)/V_carcass
233 C-----C
234 C-----C
235 C
236 Return
237 End
238 C#####C
239 Subroutine OUTPUT(Y,T,X)
240 Implicit None
241 Include 'globals.inc'
242 Include 'model.inc'
243 Real*8 Y(MaxNOE),T,X(MaxNDE)
244 Real*8 Bmax_liver, Kp_liver ,Kp_heart
245 Real*8 Kp_kidney, Bmax_kidney, Bmax_muscle,Bmax_blood,fu
246 Real*8 Bmax_heart, Kp_muscle, Kp_skin, Bmax_skin,KD
247 Real*8 Q_liver, Q_heart, Q_gut, Q_kidney, Q_skin,Q_muscle
248 Real*8 Q_eye,Q_slow,Q_rapid, Q_blood,Q_carcass,Kp_blood
249 Real*8 V_liver,V_kidney, V_muscle,V_blood,V_carcass,V_plasma
250 Real*8 V_heart,V_slow, V_rapid, V_skin, V_gut,Ci
251 Real*8 Vmaxr,Kmr, Vmaxl,Kml
252 Real*8 Vl_liver,Vl_kidney,Vl_heart,Vl_skin,Vl_muscle,Vl_carcass
253 Real*8 At_liver,At_kidney,At_heart,At_skin,At_muscle,At_carcass
254 Real*8 fnc,fnl,N1,N2,EN1,EN2,Pn,PD1,PD2,D1o,D1i,D2o,D2i
255 Real*8 V_liver2,V_kidney2,V_heart2,V_muscle2,V_skin2,V_lung2
256 real*8 V_spleen2,V_brain2
257 Real*8 V_lung
258 real*8 V_spleen,V_brain
259 CC
260 C-----C
261 C Enter Output Equations Below {e.g. Y(1) = X(1)/P(2) } C
262 C---c-----C

```



```

263 Kp_blood=11.6
264 ! Tissue volume (mL/kg)
265 V_kidney=5.25*0.273
266 V_liver=32.31*0.161
267 V_heart=2.19*0.320
268 V_skin=174.45*0.382
269 V_muscle=422.68*0.118
270 V_lung=2.642*0.336
271 V_spleen=0.973*0.207
272 V_brain=4.643*0.162
273 V_kidney2=5.25*(1.0-0.273)
274 V_liver2=32.31*(1.0-0.161)
275 V_heart2=2.19*(1.0-0.32)
276 V_skin2=174.45*(1.0-0.382)
277 V_muscle2=422.68*(1.0-0.118)
278 V_lung2=2.642*(1.0-0.336)
279 V_spleen2=0.973*(1.0-0.207)
280 V_brain2=4.643*(1.0-0.162)
281 Y(1)=(X(3)*V_liver+X(15)*V_liver2)/(V_liver+V_liver2)
282 Y(2)=(X(4)*V_kidney+X(16)*V_kidney2)/(V_kidney+V_kidney2)
283 Y(3)=(X(5)*V_heart+X(17)*V_heart2)/(V_heart+V_heart2)
284 Y(4)=X(1)*Kp_blood
285 Y(5)=(X(7)*V_muscle+X(19)*V_muscle2)/(V_muscle+V_muscle2)
286 Y(6)=(X(6)*V_skin+X(18)*V_skin2)/(V_skin+V_skin2)
287 Y(7)=X(1)
288 Y(8)=(X(8)*V_lung+X(20)*V_lung2)/(V_lung+V_lung2)
289 Y(9)=(X(9)*V_spleen+X(21)*V_spleen2)/(V_spleen+V_spleen2)
290 Y(10)=(X(10)*V_brain+X(22)*V_brain2)/(V_brain+V_brain2)
291 Y(11)=X(11)
292 C-----C
293 C-----C
294 C
295 Return
296 End
297 C#####C
298 Subroutine VARMOD(V,T,X,Y)
299 Implicit None
300 Include 'globals.inc'
301 Include 'model.inc'
302 Real*8 V(MaxNOE),T,X(MaxNDE),Y(MaxNOE)
303 CC
304 C-----C
305 C Enter Variance Model Equations Below C
306 C {e.g. V(1) = (PV(1) + PV(2)*Y(1))**2 } C
307 C---c-----C
308 V(1) = (PV(2) + PV(1)*Y(1))**2
309 V(2) = (PV(2) + PV(1)*Y(2))**2
310 V(3) = (PV(2) + PV(1)*Y(3))**2
311 V(4) = (PV(2) + PV(1)*Y(4))**2
312 V(5) = (PV(2) + PV(1)*Y(5))**2
313 V(6) = (PV(2) + PV(1)*Y(6))**2
314 V(7) = (PV(2) + PV(1)*Y(7))**2
315 V(8) = (PV(2) + PV(1)*Y(8))**2

```

```

316 V(9) = (PV(2) + PV(1)*Y(9))**2
317 V(10) = (PV(2) + PV(1)*Y(10))**2
318 V(11) = (PV(2) + PV(1)*Y(11))**2
319 C-----C
320 C-----C
321 C
322 Return
323 End
324 C#####C
325 Subroutine COVMOD(Pmean, ICmean, PC)
326 C Defines any covariate model equations (MLEM, ITS)
327 Implicit None
328 Include 'globals.inc'
329 Include 'model.inc'
330 Real*8 PC(MaxNCP)
331 Real*8 Pmean(MaxNSP+MaxNDE), ICmean(MaxNDE)
332 CC
333 C-----C
334 C Enter # of Covariate Parameters C
335 C---c-----C
336 NCparam = 0 ! Enter # of Covariate Parameters.
337 CC
338 C-----C
339 C Enter Symbol for Covariate Params {eg: PCSym(1)='CLRenal'} C
340 C---c-----C
341 CC
342 C-----C
343 C For the Model Params. that Depend on Covariates Enter the Equation C
344 C {e.g. Pmean(1) = PC(1)*R(2) } C
345 C---c-----C
346 C-----C
347 C-----C
348 C
349 Return
350 End
351 C#####C
352 Subroutine POPINIT(PmeanI,ICmeanI,PcovI,ICcovI, PCI)
353 C Initial parameter values for population program parameters (ITS, MLEM)
354 Implicit None
355 Include 'globals.inc'
356 Include 'model.inc'
357 Integer I,J
358 Real*8 PmeanI(MaxNSP+MaxNDE), ICmeanI(MaxNDE)
359 Real*8 PcovI(MaxNSP+MaxNDE,MaxNSP+MaxNDE), ICcovI(MaxNDE,MaxNDE)
360 Real*8 PCI(MaxNCP)
361 CC
362 C-----C
363 C Enter Initial Values for Population Means C
364 C { e.g. PmeanI(1) = 10.0 } C
365 C---c-----C
366 CC
367 C-----C
368 C Enter Initial Values for Pop. Covariance Matrix (Lower Triang.) C

```

```

369 C { e.g. Pcovl(2,1) = 0.25 } C
370 C-----C
371 CC
372 C-----C
373 C Enter Values for Covariate Model Parameters C
374 C { e.g. PCI(1) = 2.0 } C
375 C---c-----C
376 C-----C
377 C-----C
378 C
379 Return
380 End
381 C#####C
382 Subroutine PRIOR(Pmean,Pcov,ICmean,ICcov)
383 C Parameter mean and covariance values for MAP estimation (ID,NPD,STS)
384 Implicit None
385 Include 'globals.inc'
386 Include 'model.inc'
387 Integer I,J
388 Real*8 Pmean(MaxNSP+MaxNDE), ICmean(MaxNDE)
389 Real*8 Pcov(MaxNSP+MaxNDE,MaxNSP+MaxNDE), ICcov(MaxNDE,MaxNDE)
390 CC
391 C-----C
392 C Enter Nonzero Elements of Prior Mean Vector C
393 C { e.g. Pmean(1) = 10.0 } C
394 C---c-----C
395 CC
396 C-----C
397 C Enter Nonzero Elements of Covariance Matrix (Lower Triang.) C
398 C { e.g. Pcov(2,1) = 0.25 } C
399 C---c-----C
400 C-----C
401 C-----C
402 C
403 Return
404 End
405 C#####C
406 Subroutine SPARAM(PS,P,IC)
407 Implicit None
408 Include 'globals.inc'
409 Real*8 PS(MaxNSECP), P(MaxNSP+MaxNDE), IC(MaxNDE)
410 CC
411 C-----C
412 C Enter Equations Defining Secondary Paramters C
413 C { e.g. PS(1) = P(1)*P(2) } C
414 C---c-----C
415 C-----C
416 C-----C
417 C
418 Return
419 End
420 C#####C
421 Subroutine AMAT(A)

```

```
422 Implicit None
423 Include 'globals.inc'
424 Include 'model.inc'
425 Integer I,J
426 Real*8 A(MaxNDE,MaxNDE)
427 DO I=1,Ndeqs
428 Do J=1,Ndeqs
429 A(I,J)=0.0D0
430 End Do
431 End Do
432 CC
433 C-----C
434 C Enter non zero elements of state matrix {e.g. A(1,1) = -P(1) } C
435 C---c-----C
436 C-----C
437 C-----C
438 C
439 Return
440 End
441 C#####C
```

## Adapt Code for human PBPK model

```
1 c*****
*****
2 C ADAPT *
3 C Version 5 *
4 C*****
5 C *
6 C MODEL *
7 C *
8 C This file contains Fortran subroutines into which the user *
9 C must enter the relevant model equations and constants. *
10 C Consult the User's Guide for details concerning the format for *
11 C entered equations and definition of symbols. *
12 C *
13 C 1. Symbol- Parameter symbols and model constants *
14 C 2. DiffEq- System differential equations *
15 C 3. Output- System output equations *
16 C 4. Varmod- Error variance model equations *
17 C 5. Covmod- Covariate model equations (ITS,MLEM) *
18 C 6. Popinit- Population parameter initial values (ITS,MLEM) *
19 C 7. Prior - Parameter mean and covariance values (ID,NPD,STS) *
20 C 8. Sparam- Secondary parameters *
21 C 9. Amat - System state matrix *
22 C *
23 C*****
24 C#####C
25 Subroutine SYMBOL
26 Implicit None
27 Include 'globals.inc'
28 Include 'model.inc'
29 CC
30 C-----C
31 C Enter as Indicated C
32 C---c-----C
33 NDEqs = 66 ! Enter # of Diff. Eqs.
34 NSParam = 21 ! Enter # of System Parameters.
35 NVparam = 2 ! Enter # of Variance Parameters.
36 NSecPar = 0 ! Enter # of Secondary Parameters.
37 NSecOut = 0 ! Enter # of Secondary Outputs (not used).
38 leqsol = 1 ! Model type: 1 - DIFFEQ, 2 - AMAT, 3 - OUTPUT only.
39 Descr = ' simple PBPK of QC '
40 CC
41 C-----C
42 C Enter Symbol for Each System Parameter (eg. Psym(1)='Kel') C
43 C---c-----C
44 Psym(1)='Bmax_liver'
45 Psym(2)='Bmax_kidney'
46 Psym(3)='Bmax_heart'
47 Psym(4)='Bmax_muscle'
48 Psym(5)='Bmax_skin'
49 Psym(6)='Bmax_lung'
50 Psym(7)='Bmax_spleen'
```

```

51 Psym(8)='Bmax_brain'
52 Psym(9)='Bmax_eye'
53 Psym(10)='Bmax_carcass'
54 Psym(11)='KD'
55 Psym(12)='KD2'
56 Psym(13)='kap'
57 Psym(14)='Kal'
58 Psym(15)='CL_int'
59 Psym(16)='F'
60 Psym(17)='ft'
61 Psym(18)='PS'
62 Psym(19)='PS2'
63 Psym(20)='PS3'
64 Psym(21)='PS4'
65 CC
66 C-----C
67 C Enter Symbol for Each Variance Parameter {eg: PVsym(1)='Sigma'} C
68 C---c-----C
69 PVsym(1)='sigma'
70 PVsym(2)='intercept'
71 CC
72 C-----C
73 C Enter Symbol for Each Secondary Parameter {eg: PSsym(1)='CLt'} C
74 C---c-----C
75 C-----C
76 C-----C
77 C
78 Return
79 End
80 C#####C
81 Subroutine DIFFEQ(T,X,XP)
82 Implicit None
83 Include 'globals.inc'
84 Include 'model.inc'
85 Real*8 T,X(MaxNDE),XP(MaxNDE)
86 Real*8 ka, F, Cl_kidney, Cl_liver, fu
87 Real*8 Bmax_liver, Kp_liver ,Kp_heart,KD3
88 Real*8 Kp_kidney, Bmax_kidney, Bmax_muscle,Kp_carcass
89 Real*8 Bmax_heart, Kp_muscle, Kp_skin, Bmax_skin,KD,KD2
90 Real*8 Q_liver, Q_heart, Q_gut, Q_kidney, Q_skin,Q_muscle
91 Real*8 Q_slow,Q_rapid, Q_blood,Q_carcass,ft_s,kal
92 Real*8 V_liver,V_kidney, V_muscle,V_blood,V_carcass,V_plasma
93 Real*8 V_heart,V_slow, V_rapid, V_skin, V_gut,Cl,ft_m
94 Real*8 Vmaxr,Kmr, Vmaxl,Kml,ft_h,ft_k,ft_l,fi,GFR,ft_c
95 Real*8 Q_lung, Q_spleen, Q_brain, Q_eye, Kp_lung, Kp_spleen
96 Real*8 Kp_brain, Kp_eye, V_lung,V_spleen, V_brain, V_eye
97 Real*8 V_artery, V_vein,Bmax_spleen,ft_b,ft_e,PS,PS2,PS3,PS4
98 Real*8 Bmax_lung,Bmax_eye,Bmax_brain,Bmax_carcass
99 Real*8 V_liver2,V_kidney2,V_heart2,V_muscle2,V_skin2,V_lung2
100 real*8 V_spleen2,V_brain2,CL_total
101 real*8 Kp_liver2,Kp_heart2,Kp_kidney2,Kp_carcass2,Kp_muscle2
102 real*8 Kp_skin2,Kp_spleen2,Kp_lung2,Kp_brain2, Kp_eye2
103 real*8 Kp_liver3,Kp_heart3,Kp_kidney3,Kp_carcass3,Kp_muscle3

```

104 real\*8 Kp\_skin3,Kp\_spleen3,Kp\_lung3,Kp\_brain3, Kp\_eye3  
105 CC  
106 C-----C  
107 C Enter Differential Equations Below {e.g.  $XP(1) = -P(1)*X(1)$  } C  
108 C---c-----C  
109 ! There is no Kp\_brain, because it was permeability-limited  
110 Bmax\_liver=P(1)  
111 Bmax\_kidney=P(2)  
112 Bmax\_heart=P(3)  
113 Bmax\_muscle=P(4)  
114 Bmax\_skin=P(5)  
115 Bmax\_lung=P(6)  
116 Bmax\_spleen=P(7)  
117 Bmax\_brain=P(8)  
118 Bmax\_eye=P(9)  
119 Bmax\_carcass=P(10)  
120 KD=P(11)  
121 KD2=P(12)  
122 ka=P(13)  
123 kal=P(14)  
124 !CL\_total=P(15)  
125 Cl=P(15)  
126 Cl\_kidney=1096  
127 F=P(16)  
128 ft\_e=1.0  
129 ft\_k=1.0  
130 ft\_l=1.0  
131 ft\_m=P(17)  
132 ft\_h=1.0  
133 ft\_b=1.0  
134 ft\_s=P(17)  
135 ft\_c=1.0  
136 PS=P(18)  
137 PS2=P(19)  
138 PS3=P(20)  
139 PS4=P(21)  
140 ! Tissue volume (mL/kg)  
141 V\_kidney=4.4\*0.273  
142 V\_liver=25.7\*0.161  
143 V\_heart=4.7\*0.320  
144 V\_skin=37.1\*0.382  
145 V\_muscle=400\*0.118  
146 V\_lung=7.6\*0.336  
147 V\_spleen=2.6\*0.207  
148 V\_brain=20\*0.162  
149 V\_eye=0.214  
150 V\_artery= 13.7  
151 V\_vein=32.1  
152 V\_carcass=452.1  
153 V\_kidney2=4.4\*(1.0-0.273)  
154 V\_liver2=25.7\*(1.0-0.161)  
155 V\_heart2=4.7\*(1.0-0.320)  
156 V\_skin2=37.1\*(1.0-0.382)

157  $V_{\text{muscle2}}=400*(1.0-0.118)$   
158  $V_{\text{lung2}}=7.6*(1.0-0.336)$   
159  $V_{\text{spleen2}}=2.6*(1.0-0.207)$   
160  $V_{\text{brain2}}=20*(1.0-0.162)$   
161 ! plasma flow was used to describe the flow rate to each tissues (mL/h/kg)  
162  $Q_{\text{kidney}}=484.6$   
163  $Q_{\text{liver}}=628.6$   
164  $Q_{\text{heart}}=110.8$   
165  $Q_{\text{skin}}=160.6$   
166  $Q_{\text{muscle}}=528.9$   
167  $Q_{\text{carcass}}=401.5$   
168  $Q_{\text{lung}}=2769$   
169  $Q_{\text{spleen}}=138.6$   
170  $Q_{\text{brain}}=315.7$   
171  $Q_{\text{eye}}=0.0738$   
172  $GFR=111$   
173 !Kp  
174  $fu=0.4$   
175 !dose 150mg-----  
176  $Kp_{\text{heart}}=F*(1+B_{\text{max\_heart}}/(KD+X(5)))$   
177  $Kp_{\text{kidney}}=F*(1+B_{\text{max\_kidney}}/(KD+X(4)))$   
178  $Kp_{\text{liver}}=F*(1+B_{\text{max\_liver}}/(KD+X(3)))$   
179  $Kp_{\text{muscle}}=F*(1+B_{\text{max\_muscle}}/(KD2+X(7)))$   
180  $Kp_{\text{skin}}=F*(1+B_{\text{max\_skin}}/(KD2+X(6)))$   
181  $Kp_{\text{lung}}=F*(1+B_{\text{max\_lung}}/(KD+X(8)))$   
182  $Kp_{\text{spleen}}=F*(1+B_{\text{max\_spleen}}/(KD+X(9)))$   
183  $Kp_{\text{brain}}=F*(1+B_{\text{max\_brain}}/(KD+X(10)))$   
184  $Kp_{\text{eye}}=F*(fu*(1+B_{\text{max\_eye}}/(KD2+fu*X(1))))$   
185  $Kp_{\text{carcass}}=F*(fu*(1+B_{\text{max\_carcass}}/(KD+fu*X(1))))$   
186 !artery  
187  $XP(1)=(Q_{\text{lung}}*X(8)/fu+ka*X(2)-(CL_{\text{kidney}}+GFR)*X(1))*fu$   
188  $-(Q_{\text{liver}}+Q_{\text{kidney}}+Q_{\text{heart}}+Q_{\text{skin}}*ft_s+$   
189  $Q_{\text{muscle}}*ft_m+Q_{\text{spleen}}+Q_{\text{brain}}+Q_{\text{eye}}*ft_e+$   
190  $Q_{\text{carcass}}*ft_c)*X(1))/V_{\text{artery}}$   
191 !vein  
192  $XP(14)=((Q_{\text{liver}}+Q_{\text{spleen}})*X(3)/fu+Q_{\text{kidney}}*X(4)/fu+Q_{\text{heart}}*$   
193  $X(5)/fu+Q_{\text{skin}}*ft_s*X(6)/fu+Q_{\text{muscle}}*ft_m*X(7)/fu$   
194  $+Q_{\text{brain}}*ft_b*X(10)/fu$   
195  $+Q_{\text{eye}}*ft_e*X(11)/Kp_{\text{eye}}+$   
196  $Q_{\text{carcass}}*ft_c*X(12)/Kp_{\text{carcass}}-Q_{\text{lung}}*X(14))/V_{\text{vein}}$   
197 !oral plasma  
198  $XP(2)=-ka*X(2)$   
199 !oral liver  
200  $XP(13)=-kal*X(13)$   
201 !liver  
202  $XP(3)=(Q_{\text{liver}}*(X(1)-X(3)/fu)+Q_{\text{spleen}}*(X(9)/fu-X(3)/fu)$   
203  $+kal*X(13)-PS*(X(3)-$   
204  $X(15)/Kp_{\text{liver}}))/V_{\text{liver}}$   
205  $XP(15)=(PS*(X(3)-X(15)/Kp_{\text{liver}})-$   
206  $Cl*X(15)/Kp_{\text{liver}})/V_{\text{liver2}}$   
207 !kidney  
208  $XP(4)=(Q_{\text{kidney}}*(X(1)-X(4)/fu)-PS2*(X(4)-$   
209  $X(16)/Kp_{\text{kidney}}))/V_{\text{kidney}}$



210  $XP(16) = PS2 * (X(4) - X(16)) / Kp\_kidney / V\_kidney2$   
 211 !heart  
 212  $XP(5) = (Q\_heart * (X(1) - X(5)) / fu) - PS3 * (X(5) -$   
 213  $X(17) / Kp\_heart) / V\_heart$   
 214  $XP(17) = PS3 * (X(5) - X(17)) / Kp\_heart / V\_heart2$   
 215 !skin  
 216  $XP(6) = (Q\_skin * ft\_s * (X(1) - X(6)) / fu) - PS4 * (X(6) -$   
 217  $X(18) / Kp\_skin) / V\_skin$   
 218  $XP(18) = PS4 * (X(6) - X(18)) / Kp\_skin / V\_skin2$   
 219 !muscle  
 220  $XP(7) = (Q\_muscle * ft\_m * (X(1) - X(7)) / fu) - PS4 * (X(7) -$   
 221  $X(19) / Kp\_muscle) / V\_muscle$   
 222  $XP(19) = PS4 * (X(7) - X(19)) / Kp\_muscle / V\_muscle2$   
 223 !lung  
 224  $XP(8) = (Q\_lung * (X(14) - X(8)) / fu) - PS2 * (X(8) -$   
 225  $X(20) / Kp\_lung) / V\_lung$   
 226  $XP(20) = PS2 * (X(8) - X(20)) / Kp\_lung / V\_lung2$   
 227 !spleen  
 228  $XP(9) = (Q\_spleen * (X(1) - X(9)) / fu) - PS2 * (X(9) -$   
 229  $X(21) / Kp\_spleen) / V\_spleen$   
 230  $XP(21) = PS2 * (X(9) - X(21)) / Kp\_spleen / V\_spleen2$   
 231 !brain  
 232  $XP(10) = (Q\_brain * (X(1) - X(10)) / fu) - PS3 * (X(10) -$   
 233  $X(22) / Kp\_brain) / V\_brain$   
 234  $XP(22) = PS3 * (X(10) - X(22)) / Kp\_brain / V\_brain2$   
 235 !eye  
 236  $XP(11) = Q\_eye * ft\_e * (X(1) - X(11)) / Kp\_eye / V\_eye$   
 237 !carcass  
 238  $XP(12) = Q\_carcass * ft\_c * (X(1) - X(12)) / Kp\_carcass / V\_carcass$   
 239 !dose

300mg-----  
 -----

240  $Kp\_heart2 = F * (1 + Bmax\_heart / (KD + X(27)))$   
 241  $Kp\_kidney2 = F * (1 + Bmax\_kidney / (KD + X(26)))$   
 242  $Kp\_liver2 = F * (1 + Bmax\_liver / (KD + X(25)))$   
 243  $Kp\_muscle2 = F * (1 + Bmax\_muscle / (KD2 + X(29)))$   
 244  $Kp\_skin2 = F * (1 + Bmax\_skin / (KD2 + X(28)))$   
 245  $Kp\_lung2 = F * (1 + Bmax\_lung / (KD + X(30)))$   
 246  $Kp\_spleen2 = F * (1 + Bmax\_spleen / (KD + X(31)))$   
 247  $Kp\_brain2 = F * (1 + Bmax\_brain / (KD + X(32)))$   
 248  $Kp\_eye2 = F * (fu * (1 + Bmax\_eye / (KD2 + fu * X(23))))$   
 249  $Kp\_carcass2 = F * (fu * (1 + Bmax\_carcass / (KD + fu * X(23))))$   
 250 !artery  
 251  $XP(23) = (Q\_lung * X(30) / fu + ka * X(24) - (GFR + Cl\_kidney) * X(23)) * fu$   
 252  $- (Q\_liver + Q\_kidney + Q\_heart + Q\_skin * ft\_s +$   
 253  $Q\_muscle * ft\_m + Q\_spleen + Q\_brain + Q\_eye * ft\_e +$   
 254  $Q\_carcass * ft\_c) * X(23) / V\_artery$   
 255 !vein  
 256  $XP(36) = ((Q\_liver + Q\_spleen) * X(25) / fu + Q\_kidney * X(26) / fu + Q\_heart *$   
 257  $X(27) / fu + Q\_skin * ft\_s * X(28) / fu + Q\_muscle * ft\_m * X(29) / fu$   
 258  $+ Q\_brain * ft\_b * X(32) / fu$   
 259  $+ Q\_eye * ft\_e * X(33) / Kp\_eye2 +$   
 260  $Q\_carcass * ft\_c * X(34) / Kp\_carcass2 - Q\_lung * X(36)) / V\_vein$

261 loral plasma  
 262  $XP(24) = -ka * X(24)$   
 263 loral liver  
 264  $XP(35) = -kal * X(35)$   
 265 lliver  
 266  $XP(25) = (Q\_liver * (X(23) - X(25) / fu) + Q\_spleen * (X(31) / fu - X(25) / fu) + kal * X(35) - PS * (X(25) - X(37) / Kp\_liver2)) / V\_liver$   
 267  
 268  
 269  $XP(37) = (PS * (X(25) - X(37) / Kp\_liver2) - Cl * X(37) / Kp\_liver2) / V\_liver2$   
 270  
 271 lkidney  
 272  $XP(26) = (Q\_kidney * (X(23) - X(26) / fu) - PS2 * (X(26) - X(38) / Kp\_kidney2)) / V\_kidney$   
 273  
 274  $XP(38) = PS2 * (X(26) - X(38) / Kp\_kidney2) / V\_kidney2$   
 275 lheart  
 276  $XP(27) = (Q\_heart * (X(23) - X(27) / fu) - PS3 * (X(27) - X(39) / Kp\_heart2)) / V\_heart$   
 277  
 278  $XP(39) = PS3 * (X(27) - X(39) / Kp\_heart2) / V\_heart2$   
 279 lskin  
 280  $XP(28) = (Q\_skin * ft\_s * (X(23) - X(28) / fu) - PS4 * (X(28) - X(40) / Kp\_skin2)) / V\_skin$   
 281  
 282  $XP(40) = PS4 * (X(28) - X(40) / Kp\_skin2) / V\_skin2$   
 283 lmuscle  
 284  $XP(29) = (Q\_muscle * ft\_m * (X(23) - X(29) / fu) - PS4 * (X(29) - X(41) / Kp\_muscle2)) / V\_muscle$   
 285  
 286  $XP(41) = PS4 * (X(29) - X(41) / Kp\_muscle2) / V\_muscle2$   
 287 llung  
 288  $XP(30) = (Q\_lung * (X(36) - X(30) / fu) - PS2 * (X(30) - X(42) / Kp\_lung2)) / V\_lung$   
 289  
 290  $XP(42) = PS2 * (X(30) - X(42) / Kp\_lung2) / V\_lung2$   
 291 lspleen  
 292  $XP(31) = (Q\_spleen * (X(23) - X(31) / fu) - PS2 * (X(31) - X(43) / Kp\_spleen2)) / V\_spleen$   
 293  
 294  $XP(43) = PS2 * (X(31) - X(43) / Kp\_spleen2) / V\_spleen2$   
 295 lbrain  
 296  $XP(32) = (Q\_brain * (X(23) - X(32) / fu) - PS3 * (X(32) - X(44) / Kp\_brain2)) / V\_brain$   
 297  
 298  $XP(44) = PS3 * (X(32) - X(44) / Kp\_brain2) / V\_brain2$   
 299 leye  
 300  $XP(33) = Q\_eye * ft\_e * (X(23) - X(33) / Kp\_eye2) / V\_eye$   
 301 lcarcass  
 302  $XP(34) = Q\_carcass * ft\_c * (X(23) - X(34) / Kp\_carcass2) / V\_carcass$   
 303 ldose  
 600mg-----  
 -----  
 304  $Kp\_heart3 = F * (1 + Bmax\_heart / (KD + (49)))$   
 305  $Kp\_kidney3 = F * (1 + Bmax\_kidney / (KD + X(48)))$   
 306  $Kp\_liver3 = F * (1 + Bmax\_liver / (KD + X(47)))$   
 307  $Kp\_muscle3 = F * (1 + Bmax\_muscle / (KD2 + X(51)))$   
 308  $Kp\_skin3 = F * (1 + Bmax\_skin / (KD2 + X(50)))$   
 309  $Kp\_lung3 = F * (1 + Bmax\_lung / (KD + X(52)))$   
 310  $Kp\_spleen3 = F * (1 + Bmax\_spleen / (KD + X(53)))$   
 311  $Kp\_brain3 = F * (1 + Bmax\_brain / (KD + X(54)))$

312  $Kp\_eye3 = F * (fu * (1 + Bmax\_eye / (KD2 + fu * X(45))))$   
313  $Kp\_carcass3 = F * (fu * (1 + Bmax\_carcass / (KD + fu * X(45))))$   
314 **!artery**  
315  $XP(45) = (Q\_lung * X(52) / fu + ka * X(46) - (GFR + CL\_kidney) * X(45) * fu$   
316  $- (Q\_liver + Q\_kidney + Q\_heart + Q\_skin * ft\_s +$   
317  $Q\_muscle * ft\_m + Q\_spleen + Q\_brain + Q\_eye * ft\_e +$   
318  $Q\_carcass * ft\_c) * X(45) / V\_artery$   
319 **!vein**  
320  $XP(58) = ((Q\_liver + Q\_spleen) * X(47) / fu + Q\_kidney * X(48) / fu + Q\_heart *$   
321  $X(49) / fu + Q\_skin * ft\_s * X(50) / fu + Q\_muscle * ft\_m * X(51) / fu$   
322  $+ Q\_brain * ft\_b * X(54) / fu$   
323  $+ Q\_eye * ft\_e * X(55) / Kp\_eye3 +$   
324  $Q\_carcass * ft\_c * X(56) / Kp\_carcass3 - Q\_lung * X(58) / V\_vein$   
325 **!oral plasma**  
326  $XP(46) = -ka * X(46)$   
327 **!oral liver**  
328  $XP(57) = -kal * X(57)$   
329 **!liver**  
330  $XP(47) = (Q\_liver * (X(45) - X(47) / fu) + Q\_spleen * (X(53) / fu - X(47) / fu)$   
331  $+ kal * X(57) - PS * (X(47) -$   
332  $X(59) / Kp\_liver3) / V\_liver$   
333  $XP(59) = (PS * (X(47) - X(59) / Kp\_liver3) -$   
334  $Cl * X(59) / Kp\_liver3) / V\_liver2$   
335 **!kidney**  
336  $XP(48) = (Q\_kidney * (X(45) - X(48) / fu) - PS2 * (X(48) -$   
337  $X(60) / Kp\_kidney3) / V\_kidney$   
338  $XP(60) = PS2 * (X(48) - X(60) / Kp\_kidney3) / V\_kidney2$   
339 **!heart**  
340  $XP(49) = (Q\_heart * (X(45) - X(49) / fu) - PS3 * (X(49) -$   
341  $X(61) / Kp\_heart3) / V\_heart$   
342  $XP(61) = PS3 * (X(49) - X(61) / Kp\_heart3) / V\_heart2$   
343 **!skin**  
344  $XP(50) = (Q\_skin * ft\_s * (X(45) - X(50) / fu) - PS4 * (X(50) -$   
345  $X(62) / Kp\_skin3) / V\_skin$   
346  $XP(62) = PS4 * (X(50) - X(62) / Kp\_skin3) / V\_skin2$   
347 **!muscle**  
348  $XP(51) = (Q\_muscle * ft\_m * (X(45) - X(51) / fu) - PS4 * (X(51) -$   
349  $X(63) / Kp\_muscle3) / V\_muscle$   
350  $XP(63) = PS4 * (X(51) - X(63) / Kp\_muscle3) / V\_muscle2$   
351 **!lung**  
352  $XP(52) = (Q\_lung * (X(58) - X(52) / fu) - PS2 * (X(52) -$   
353  $X(64) / Kp\_lung3) / V\_lung$   
354  $XP(64) = PS2 * (X(52) - X(64) / Kp\_lung3) / V\_lung2$   
355 **!spleen**  
356  $XP(53) = (Q\_spleen * (X(45) - X(53) / fu) - PS2 * (X(53) -$   
357  $X(65) / Kp\_spleen3) / V\_spleen$   
358  $XP(65) = PS2 * (X(53) - X(65) / Kp\_spleen3) / V\_spleen2$   
359 **!brain**  
360  $XP(54) = (Q\_brain * (X(45) - X(54) / fu) - PS3 * (X(54) -$   
361  $X(66) / Kp\_brain3) / V\_brain$   
362  $XP(66) = PS3 * (X(54) - X(66) / Kp\_brain3) / V\_brain2$   
363 **!eye**  
364  $XP(55) = Q\_eye * ft\_e * (X(45) - X(55) / Kp\_eye3) / V\_eye$

```

365 !carcass
366 XP(56)=Q_carcass*ft_c*(X(45)-X(56)/Kp_carcass3)/V_carcass
367 C-----C
368 C-----C
369 C
370 Return
371 End
372 C#####C
373 Subroutine OUTPUT(Y,T,X)
374 Implicit None
375 Include 'globals.inc'
376 Include 'model.inc'
377 Real*8 Y(MaxNOE),T,X(MaxNDE)
378 Real*8 Bmax_liver, Kp_liver, Kp_heart
379 Real*8 Kp_kidney, Bmax_kidney, Bmax_muscle, Bmax_blood, fu
380 Real*8 Bmax_heart, Kp_muscle, Kp_skin, Bmax_skin, KD
381 Real*8 Q_liver, Q_heart, Q_gut, Q_kidney, Q_skin, Q_muscle
382 Real*8 Q_eye, Q_slow, Q_rapid, Q_blood, Q_carcass, Kp_blood
383 Real*8 V_liver, V_kidney, V_muscle, V_blood, V_carcass, V_plasma
384 Real*8 V_heart, V_slow, V_rapid, V_skin, V_gut, Cl
385 Real*8 Vmaxr, Kmr, Vmaxl, Kml
386 Real*8 Vl_liver, Vl_kidney, Vl_heart, Vl_skin, Vl_muscle, Vl_carcass
387 Real*8 At_liver, At_kidney, At_heart, At_skin, At_muscle, At_carcass
388 Real*8 fnc, fnl, N1, N2, EN1, EN2, Pn, PD1, PD2, D1o, D1i, D2o, D2i
389 Real*8 V_liver2, V_kidney2, V_heart2, V_muscle2, V_skin2, V_lung2
390 real*8 V_spleen2, V_brain2
391 Real*8 V_lung
392 real*8 V_spleen, V_brain
393 CC
394 C-----C
395 C Enter Output Equations Below {e.g. Y(1) = X(1)/P(2) } C
396 C---c-----C
397 Y(1)=X(1)
398 Y(2)=X(23)
399 Y(3)=X(45)
400 C-----C
401 C-----C
402 C
403 Return
404 End
405 C#####C
406 Subroutine VARMOD(V,T,X,Y)
407 Implicit None
408 Include 'globals.inc'
409 Include 'model.inc'
410 Real*8 V(MaxNOE),T,X(MaxNDE),Y(MaxNOE)
411 CC
412 C-----C
413 C Enter Variance Model Equations Below C
414 C {e.g. V(1) = (PV(1) + PV(2)*Y(1))**2 } C
415 C---c-----C
416 V(1) = (PV(2) + PV(1)*Y(1))**2
417 V(2) = (PV(2) + PV(1)*Y(2))**2

```

```

418 V(3) = (PV(2) + PV(1)*Y(3))**2
419 C-----C
420 C-----C
421 C
422 Return
423 End
424 C#####C
425 Subroutine COVMOD(Pmean, ICmean, PC)
426 C Defines any covariate model equations (MLEM, ITS)
427 Implicit None
428 Include 'globals.inc'
429 Include 'model.inc'
430 Real*8 PC(MaxNCP)
431 Real*8 Pmean(MaxNSP+MaxNDE), ICmean(MaxNDE)
432 CC
433 C-----C
434 C Enter # of Covariate Parameters C
435 C---c-----C
436 NCparam = 0 ! Enter # of Covariate Parameters.
437 CC
438 C-----C
439 C Enter Symbol for Covariate Params {eg: PCsym(1)='CLRenal'} C
440 C---c-----C
441 CC
442 C-----C
443 C For the Model Params. that Depend on Covariates Enter the Equation C
444 C {e.g. Pmean(1) = PC(1)*R(2) } C
445 C---c-----C
446 C-----C
447 C-----C
448 C
449 Return
450 End
451 C#####C
452 Subroutine POPINIT(PmeanI,ICmeanI,PcovI,ICcovI, PCI)
453 C Initial parameter values for population program parameters (ITS, MLEM)
454 Implicit None
455 Include 'globals.inc'
456 Include 'model.inc'
457 Integer I,J
458 Real*8 PmeanI(MaxNSP+MaxNDE), ICmeanI(MaxNDE)
459 Real*8 PcovI(MaxNSP+MaxNDE,MaxNSP+MaxNDE), ICcovI(MaxNDE,MaxNDE)
460 Real*8 PCI(MaxNCP)
461 CC
462 C-----C
463 C Enter Initial Values for Population Means C
464 C { e.g. PmeanI(1) = 10.0 } C
465 C---c-----C
466 CC
467 C-----C
468 C Enter Initial Values for Pop. Covariance Matrix (Lower Triang.) C
469 C { e.g. PcovI(2,1) = 0.25 } C
470 C---c-----C

```

```

471 CC
472 C-----C
473 C Enter Values for Covariate Model Parameters C
474 C { e.g. PCI(1) = 2.0 } C
475 C---c-----C
476 C-----C
477 C-----C
478 C
479 Return
480 End
481 C#####C
482 Subroutine PRIOR(Pmean,Pcov,ICmean,ICcov)
483 C Parameter mean and covariance values for MAP estimation (ID,NPD,STS)
484 Implicit None
485 Include 'globals.inc'
486 Include 'model.inc'
487 Integer I,J
488 Real*8 Pmean(MaxNSP+MaxNDE), ICmean(MaxNDE)
489 Real*8 Pcov(MaxNSP+MaxNDE,MaxNSP+MaxNDE), ICcov(MaxNDE,MaxNDE)
490 CC
491 C-----C
492 C Enter Nonzero Elements of Prior Mean Vector C
493 C { e.g. Pmean(1) = 10.0 } C
494 C---c-----C
495 CC
496 C-----C
497 C Enter Nonzero Elements of Covariance Matrix (Lower Triang.) C
498 C { e.g. Pcov(2,1) = 0.25 } C
499 C---c-----C
500 C-----C
501 C-----C
502 C
503 Return
504 End
505 C#####C
506 Subroutine SPARAM(PS,P,IC)
507 Implicit None
508 Include 'globals.inc'
509 Real*8 PS(MaxNSECP), P(MaxNSP+MaxNDE), IC(MaxNDE)
510 CC
511 C-----C
512 C Enter Equations Defining Secondary Paramters C
513 C { e.g. PS(1) = P(1)*P(2) } C
514 C---c-----C
515 C-----C
516 C-----C
517 C
518 Return
519 End
520 C#####C
521 Subroutine AMAT(A)
522 Implicit None
523 Include 'globals.inc'

```

```
524 Include 'model.inc'
525 Integer I,J
526 Real*8 A(MaxNDE,MaxNDE)
527 DO I=1,Ndeqs
528 Do J=1,Ndeqs
529 A(I,J)=0.0D0
530 End Do
531 End Do
532 CC
533 C-----C
534 C Enter non zero elements of state matrix {e.g. A(1,1) = -P(1) } C
535 C---c-----C
536 C-----C
537 C-----C
538 C
539 Return
540 End
541 C#####C
```
